# Supplementary material for: Quality evaluation for Ficus hirta Vahl granules, using TLC and HPLC fingerprint combined with chemical pattern recognition
Source: Royal Society of Chemistry journal article supplement (doi:10.1039/d4ay01097c), 2024-01-01
Supplement: d4ay01097c1.pdf [file d4ay01097c1.pdf]

## Supporting Information

**Table S1** 15 batches of FHG Similarity results

| No.                           | S1    | S2    | S3    | S4    | S5    | S6    | S7    | S8    | S9    | S10   | S11   | S12   | S13   | S14   | S15   | fingerprint comparison |
|-------------------------------|-------|-------|-------|-------|-------|-------|-------|-------|-------|-------|-------|-------|-------|-------|-------|------------------------|
| <b>S1</b>                     | 1.000 | 0.993 | 0.971 | 0.989 | 0.991 | 0.994 | 0.987 | 0.959 | 0.994 | 0.972 | 0.998 | 0.996 | 0.998 | 0.996 | 1.000 | 0.996                  |
| <b>S2</b>                     | 0.993 | 1.000 | 0.990 | 0.999 | 1.000 | 1.000 | 0.999 | 0.983 | 1.000 | 0.988 | 0.997 | 0.998 | 0.997 | 0.998 | 0.994 | 0.999                  |
| <b>S3</b>                     | 0.971 | 0.990 | 1.000 | 0.990 | 0.993 | 0.988 | 0.995 | 0.996 | 0.988 | 0.998 | 0.983 | 0.986 | 0.985 | 0.988 | 0.974 | 0.988                  |
| <b>S4</b>                     | 0.989 | 0.999 | 0.990 | 1.000 | 0.998 | 0.999 | 0.998 | 0.982 | 0.999 | 0.987 | 0.993 | 0.995 | 0.994 | 0.995 | 0.990 | 0.996                  |
| <b>S5</b>                     | 0.991 | 1.000 | 0.993 | 0.998 | 1.000 | 0.999 | 0.999 | 0.986 | 0.999 | 0.992 | 0.997 | 0.998 | 0.997 | 0.998 | 0.993 | 0.999                  |
| <b>S6</b>                     | 0.994 | 1.000 | 0.988 | 0.999 | 0.999 | 1.000 | 0.998 | 0.981 | 1.000 | 0.986 | 0.998 | 0.998 | 0.998 | 0.998 | 0.995 | 0.999                  |
| <b>S7</b>                     | 0.987 | 0.999 | 0.995 | 0.998 | 0.999 | 0.998 | 1.000 | 0.990 | 0.998 | 0.993 | 0.994 | 0.996 | 0.995 | 0.996 | 0.989 | 0.997                  |
| <b>S8</b>                     | 0.959 | 0.983 | 0.996 | 0.982 | 0.986 | 0.981 | 0.990 | 1.000 | 0.980 | 0.995 | 0.974 | 0.977 | 0.975 | 0.980 | 0.963 | 0.979                  |
| <b>S9</b>                     | 0.994 | 1.000 | 0.988 | 0.999 | 0.999 | 1.000 | 0.998 | 0.980 | 1.000 | 0.986 | 0.998 | 0.999 | 0.998 | 0.998 | 0.995 | 0.999                  |
| <b>S10</b>                    | 0.972 | 0.988 | 0.998 | 0.987 | 0.992 | 0.986 | 0.993 | 0.995 | 0.986 | 1.000 | 0.982 | 0.983 | 0.985 | 0.989 | 0.975 | 0.987                  |
| <b>S11</b>                    | 0.998 | 0.997 | 0.983 | 0.993 | 0.997 | 0.998 | 0.994 | 0.974 | 0.998 | 0.982 | 1.000 | 1.000 | 1.000 | 0.999 | 0.998 | 0.999                  |
| <b>S12</b>                    | 0.996 | 0.998 | 0.986 | 0.995 | 0.998 | 0.998 | 0.996 | 0.977 | 0.999 | 0.983 | 1.000 | 1.000 | 0.999 | 0.998 | 0.997 | 0.999                  |
| <b>S13</b>                    | 0.998 | 0.997 | 0.985 | 0.994 | 0.997 | 0.998 | 0.995 | 0.975 | 0.998 | 0.985 | 1.000 | 0.999 | 1.000 | 0.999 | 0.999 | 1.000                  |
| <b>S14</b>                    | 0.996 | 0.998 | 0.988 | 0.995 | 0.998 | 0.998 | 0.996 | 0.980 | 0.998 | 0.989 | 0.999 | 0.998 | 0.999 | 1.000 | 0.997 | 1.000                  |
| <b>S15</b>                    | 1.000 | 0.994 | 0.974 | 0.990 | 0.993 | 0.995 | 0.989 | 0.963 | 0.995 | 0.975 | 0.998 | 0.997 | 0.999 | 0.997 | 1.000 | 0.997                  |
| <b>fingerprint comparison</b> | 0.996 | 0.999 | 0.988 | 0.996 | 0.999 | 0.999 | 0.997 | 0.979 | 0.999 | 0.987 | 0.999 | 0.999 | 1.000 | 1.000 | 0.997 | 1.000                  |

**Table S2** Method validation results (% RSD) of the psoralen HPLC quantitation method

| Number of detections | Peak area of rosmarinic acid (mAU) |               |           |
|----------------------|------------------------------------|---------------|-----------|
|                      | Precision                          | Repeatability | Stability |
| 1                    | 6473042                            | 6427015       | 6442623   |
| 2                    | 6482912                            | 6440303       | 6432668   |
| 3                    | 6487449                            | 6377031       | 6462926   |
| 4                    | 6485073                            | 6385491       | 6473812   |
| 5                    | 6485093                            | 6414619       | 6498735   |
| 6                    | 6498735                            | 6422272       | 6397142   |
| RSD (%)              | 0.13                               | 0.39          | 0.55      |

**Table S3** Method validation results (% RSD) of the bergapten HPLC quantitation method

| Number of detections | Peak area of rosmarinic acid (mAU) |               |           |
|----------------------|------------------------------------|---------------|-----------|
|                      | Precision                          | Repeatability | Stability |
| 1                    | 558256                             | 546911        | 552831    |
| 2                    | 547327                             | 542104        | 548596    |
| 3                    | 546642                             | 544815        | 551356    |
| 4                    | 552798                             | 549663        | 555074    |
| 5                    | 545783                             | 543869        | 552331    |
| 6                    | 552331                             | 549874        | 541432    |
| RSD (%)              | 0.87                               | 0.58          | 0.88      |
